# Supplementary material
Source: PubMed Central journal article supplement (PMC3769883)
Supplement: neo1509_1036SD1.pdf [file neo1509_1036SD1.pdf]

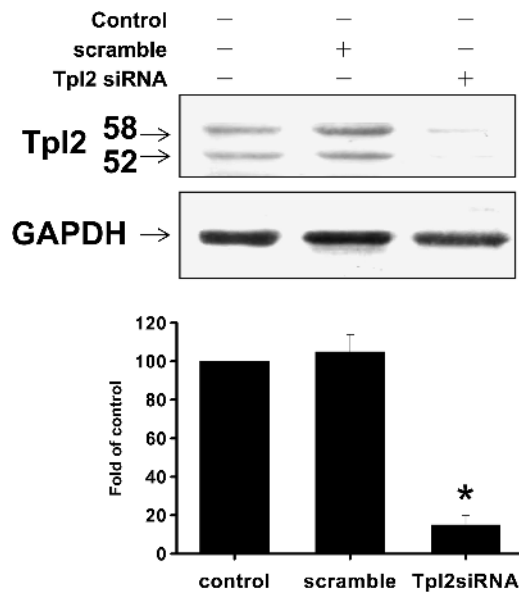

**Figure W1.** Tpl2 siRNA transfection efficacy detected by Western blot analysis. The efficiency of transfection by Lipofectin reagent (Invitrogen) was determined on the third passage. Transfection of HUVECs with Tpl2 siRNA but not scrambled siRNA caused 85% ablation of Tpl2 protein. Quantification of the protein expression was performed by densitometric analysis (Image-Pro Plus software).

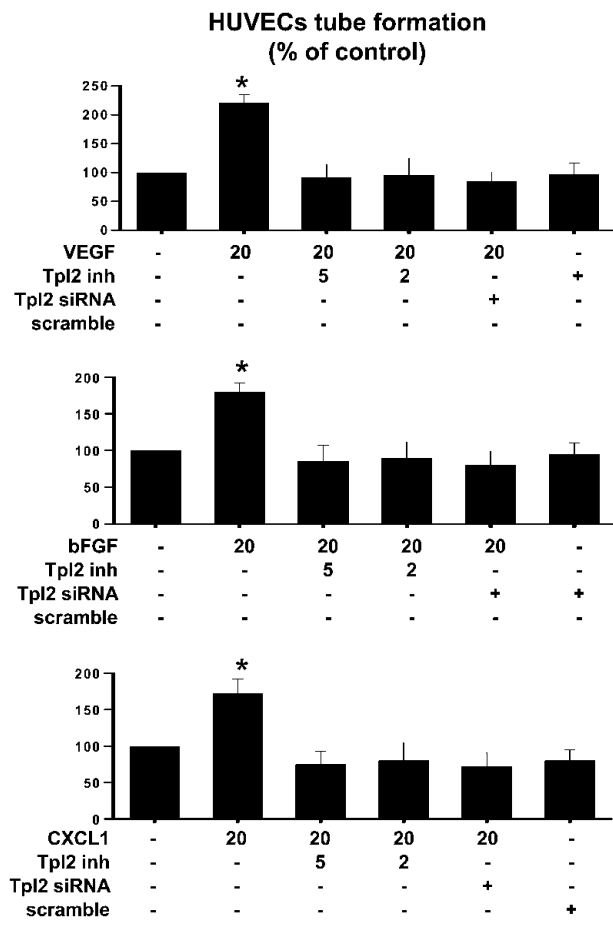

**Figure W2.** Quantification of HUVEC tube formation.
